# Supplementary material for: Pinus thunbergii Parl. Extracts Reduce Acute Inflammation by Targeting Oxidative Stress
Source: Hindawi journal article supplement (doi:10.1155/2021/7924645), 2021-01-13
Supplement: f1 [file 7924645.f1.pdf]

ID table

| No.                          | Rt <sup>a</sup> (min) | Tentative Identification         | <i>m/z</i>            |                       | M.W. <sup>b</sup> | MS Fragments pattern ( <i>m/z</i> )              | Molecular Formula | $\Delta$ ppm | REF <sup>c</sup> |
|------------------------------|-----------------------|----------------------------------|-----------------------|-----------------------|-------------------|--------------------------------------------------|-------------------|--------------|------------------|
|                              |                       |                                  | [M+H] <sup>+</sup>    | [M-H] <sup>-</sup>    |                   |                                                  |                   |              |                  |
| <i>Phenolic acid</i>         |                       |                                  |                       |                       |                   |                                                  |                   |              |                  |
| 1                            | 0.51                  | Quinic acid                      | 215.0527 <sup>e</sup> | 191.0553              | 192               | 191> 173                                         | C7H12O6           | -4.508       | STD <sup>d</sup> |
| 2                            | 4.32                  | <i>p</i> -Coumaric acid hexoside | 349.1831 <sup>e</sup> | 325.0930              | 326               | 325> 163, 121, 119                               | C15H18O8          | 0.490        | REF[1]           |
| <i>Flavonoids</i>            |                       |                                  |                       |                       |                   |                                                  |                   |              |                  |
| 3                            | 3.41                  | Gallocatechin                    | 307.0811              | 305.0668              | 306               | 305, 289, 219, 181, 167, 137, 125                | C15H14O7          | 0.308        | REF[2,3]         |
| 4                            | 4.02                  | Procyanidin B                    | 579.1500              | 577.1359              | 578               | 577> 521, 475, 443, 407, 289, 271                | C30H26O12         | 1.353        | REF[1,4]         |
| 5                            | 4.27                  | Catechin                         | 291.0863              | 289.0719              | 290               | 289> 245, 203, 191, 163, 137                     | C15H14O6          | 1.310        | STD <sup>d</sup> |
| 6                            | 6.34                  | Quercitrin                       | 449.1079              | 447.0939              | 448               | 447> 299, 179, 150                               | C21H20O11         | 0.585        | STD <sup>d</sup> |
| 7                            | 6.49                  | Isorhamnetin O-glucoside         | 479.1188              | 477.1045              | 478               | 477> 314, 299, 165                               | C22H22O12         | 0.731        | REF[5,6]         |
| 8                            | 8.17                  | Quercetin (coumaroyl-glucoside)  | 611.1399              | 609.1260              | 610               | 609> 579, 531, 491, 445, 463, 329, 315, 300, 291 | C30H26O14         | 1.001        | REF[7]           |
| 9                            | 10.31                 | Pinocembrin                      | 257.0808              | 255.0663              | 256               | 255> 213, 185, 171, 151, 145, 107                | C15H12O4          | -0.012       | STD <sup>d</sup> |
| <i>Lignan</i>                |                       |                                  |                       |                       |                   |                                                  |                   |              |                  |
| 10                           | 5.64                  | Secoisolariciresinol-diglucoside | 709.2681 <sup>e</sup> | 731.2786 <sup>f</sup> | 686               | 731> 475, 359, 345, 327, 313, 179, 167           | C32H46O16         | 1.767        | REF[8-10]        |
| 11                           | 5.94                  | Lignan deriv.                    | 985.4066              | 491.1930              | 492               | 491>473, 327, 313, 149                           | C25H32O10         | 1.404        | REF[8,11]        |
| 12                           | 6.07                  | Secoisolariciresinol-glucoside   | 547.2153 <sup>e</sup> | 523.2196              | 524               | 523>475, 419, 361, 343, 327, 195, 165            | C26H36O11         | 1.558        | REF[8,10]        |
| 13                           | 6.35                  | Secoisolariciresinol-xyloside    | 989.4346 <sup>g</sup> | 539.2142 <sup>f</sup> | 494               | 539> 493, 477, 361, 343, 300, 165                | C25H34O10         | 1.540        | REF[8,10]        |
| 14                           | 6.44                  | Icariside E4                     | 529.2053 <sup>e</sup> | 551.2145 <sup>f</sup> | 506               | 551> 381, 367, 341, 329, 314                     | C26H34O10         | 0.744        | REF[7,8]         |
| <i>Sesquiterpenoid</i>       |                       |                                  |                       |                       |                   |                                                  |                   |              |                  |
| 15                           | 4.66                  | Roseoside                        | 409.1831 <sup>e</sup> | 431.1925 <sup>f</sup> | 386               | 431>385, 367, 223                                | C19H30O8          | 0.765        | REF[12,13]       |
| <i>Long chain fatty acid</i> |                       |                                  |                       |                       |                   |                                                  |                   |              |                  |
| 16                           | 8.91                  | Pinellic acid                    | 353.2300 <sup>e</sup> | 329.2337              | 330               | 329> 229, 211, 179, 171                          | C18H34O5          | 0.293        | REF[14,15]       |

<sup>a</sup> Retention time; <sup>b</sup> Molecular weight; <sup>c</sup> Reference; <sup>d</sup> Standard; <sup>e</sup> [M+Na]; <sup>f</sup> [M+FA-H]; <sup>g</sup> [2M+H]

Compound chemical structure derived from *PTP*

No.1 Quinic acid

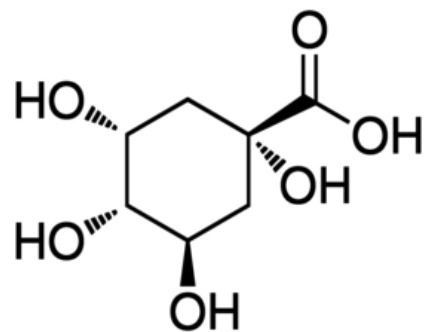

No.2 *p*-Coumaric acid hexoside

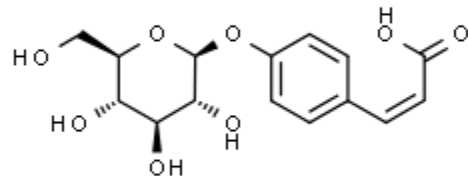

No.3 Gallocatechin

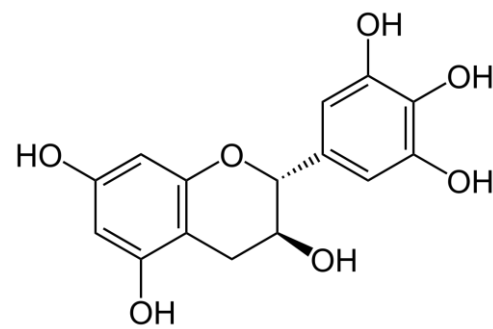

No.4 Procyanidin B

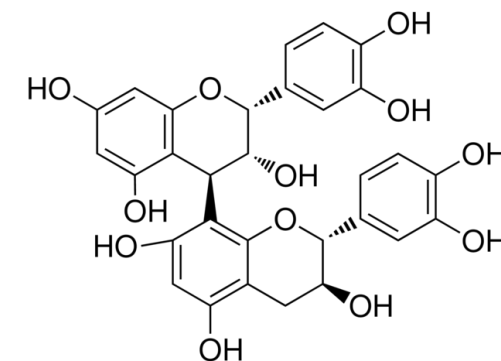

No.5 Catechin

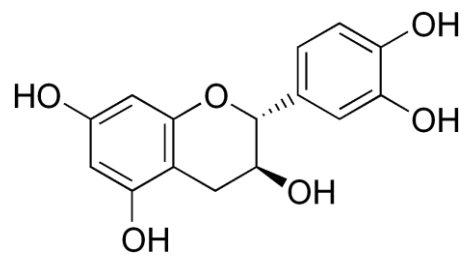

No.6 Quercitrin

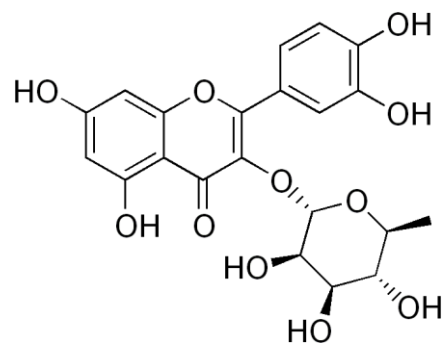

No.7 Isorhamnetin O-glucoside

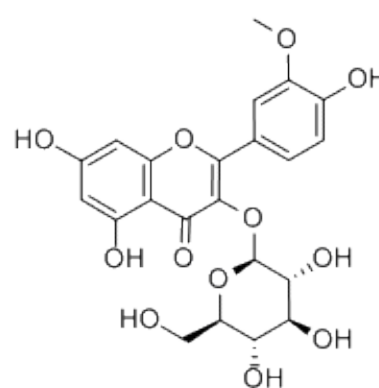

No.8 Quercetin (coumaroyl-glucoside)

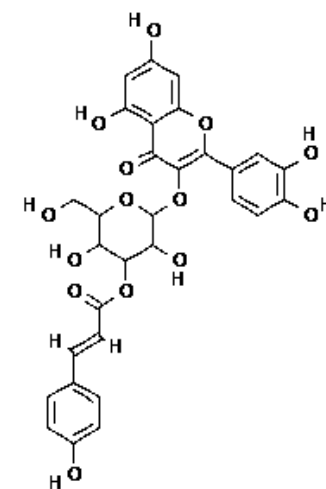

Compound chemical structure derived from *PTP*

No.9 Pinocembrin

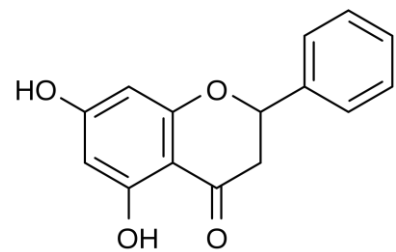

No.10 Secoisolariciresinol-diglucoside

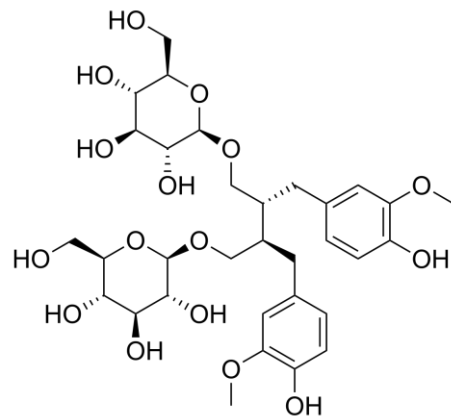

No.11 Lignan deriv.

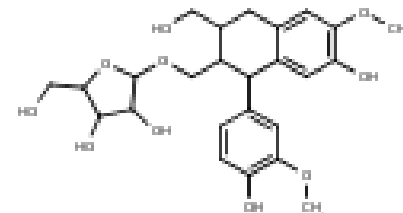

No.12 Secoisolariciresinol-glucoside

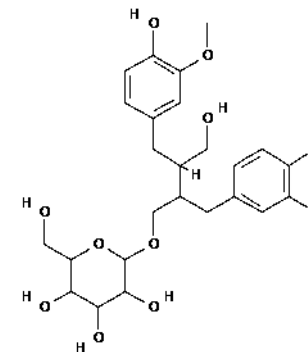

No.13 Secoisolariciresinol-xyloside

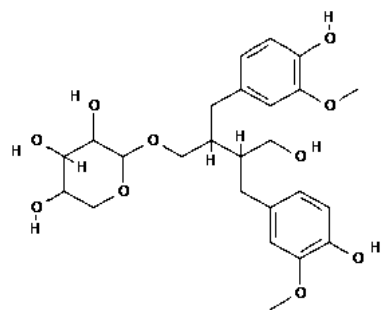

No.14 Icariside E4

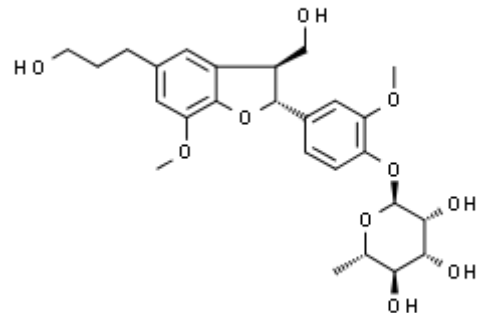

No.15 Roseoside

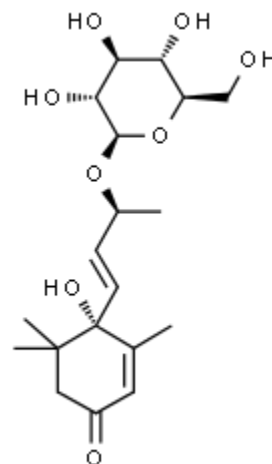

No.16 Pinellic acid

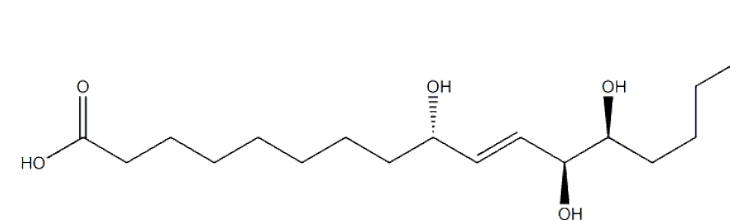

## Reference

- REF[1]** Mekky, Reham Hassan, et al. "Phenolic compounds from sesame cake and antioxidant activity: a new insight for agri-food residues' significance for sustainable development." *Foods* 8.10 (2019): 432.
- REF[2]** Yuzuak, Seyit, James Ballington, and De-Yu Xie. "HPLC-qTOF-MS/MS-Based Profiling of Flavan-3-ols and Dimeric Proanthocyanidins in Berries of Two Muscadine Grape Hybrids FLH 13-11 and FLH 17-66." *Metabolites* 8.4 (2018): 57
- REF[3]** Lundgren, Lennart N., and Olof Theander. "Cis-and trans-dihydroquercetin glucosides from needles of *Pinus sylvestris*." *Phytochemistry* 27.3 (1988): 829-832.
- REF[4]** Li, Ying-Ya, et al. "Pine bark extracts: nutraceutical, pharmacological, and toxicological evaluation." *Journal of Pharmacology and Experimental Therapeutics* 353.1 (2015): 9-16.
- REF[5]** Slimestad, R. "Flavonoids in buds and young needles of *Picea*, *Pinus* and *Abies*." *Biochemical systematics and ecology* 31.11 (2003): 1247-1255.
- REF[6]** Lei, Zhentian, et al. "Metabolomics of Two Pecan Varieties Provides Insights into Scab Resistance." *Metabolites* 8.4 (2018): 56.
- REF[7]** Chen, Guan-Heng, et al. "Characterization of vasorelaxant principles from the needles of *Pinus morrisonicola* Hayata." *Molecules* 23.1 (2018): 86..
- REF[8]** Li, Bo, et al. "Chemical constituents and biological activities of *pinus* species." *Chemistry & biodiversity* 10.12 (2013): 2133..
- REF[9]** Yashunsky, D. V., et al. "Analysis of content of (–)-secoisolariciresinol and related polyphenols in different morphological parts and anatomical structures of larch wood from *Siberia*." *Russian Chemical Bulletin* 63.11 (2014): 2571-2576.
- REF[10]** Quartieri, Andrea, et al. "Detection of novel metabolites of flaxseed lignans in vitro and in vivo." *Molecular nutrition & food research* 60.7 (2016): 1590-1601.
- REF[11]** Fischer, Ulrike Anna, et al. "Determination of lignans in edible and nonedible parts of pomegranate (*Punica granatum* L.) and products derived therefrom, particularly focusing on the quantitation of isolariciresinol using HPLC-DAD-ESI/MS n." *Journal of agricultural and food chemistry* 60.1 (2012): 283-292.
- REF[12]** Sun, Liqiong, Shutian Tao, and Shaoling Zhang. "Characterization and quantification of polyphenols and triterpenoids in thinned young fruits of ten pear varieties by UPLC-Q TRAP-MS/MS." *Molecules* 24.1 (2019): 159.
- REF[13]** Shen, YanBo, and Minoru Terazawa. "Dihydroroseoside, a new cyclohexanone glucoside, from the leaves of shirakamba (*Betula platyphylla* Sukatchev var. *japonica* Hara)." *Journal of wood science* 47.2 (2001): 145-148.
- REF[14]** Ruan, Jingya, et al. "Comprehensive Chemical Profiling in the Ethanol Extract of *Pluchea indica* Aerial Parts by Liquid Chromatography/Mass Spectrometry Analysis of Its Silica Gel Column Chromatography Fractions." *Molecules* 24.15 (2019): 2784.
- REF[15]** Peng, Wan-Xi, et al. "Determination of biomedicine resource of benzene/ethanol extractives of masson pine (*Pinus massoniana* L.) wood by Py-GC/MS." *2008 2nd International Conference on Bioinformatics and Biomedical Engineering*. IEEE, 2008.
